# Supplementary material
Source: PubMed Central journal article supplement (PMC2234209)

**A****Seizure Index**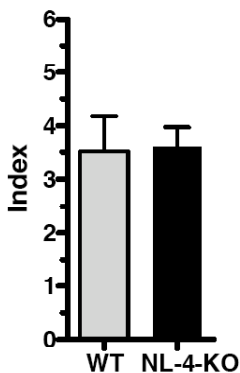**B****Immobility**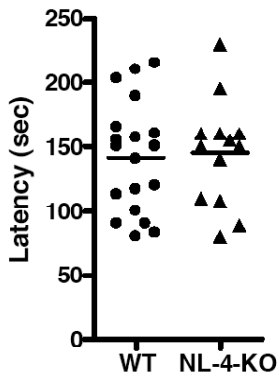**C****Head Jerk**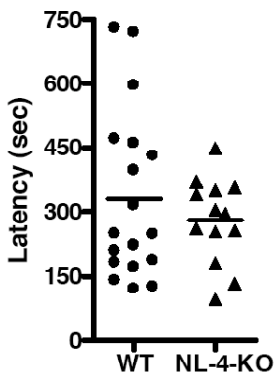**D****Forelimb**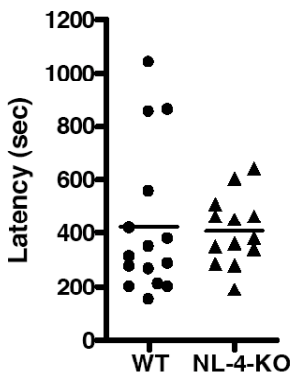

Supplement: pnas_0711555105_7.pdf [file pnas_0711555105_7.pdf]
